# Supplementary material for: Enhanced Autophagy of Adipose-Derived Stem Cells Grown on Chitosan Substrates
Source: PubMed Central journal article supplement (PMC4497627; doi:10.1089/biores.2014.0032), 2015-01-01

## Supplementary Data:

### The Autophagy Level of Adipose-Derived Stem Cell Spheroids on Petri Dish

#### Methods

Adipose-derived stem cells (ADSCs) were seeded on tissue culture polystyrene (TCPS) or Petri dish at a density of  $2.5 \times 10^5$  cells per well in a 6-well culture plate and were harvested at 8 h. The morphology of ADSC spheroids was observed by an inverted microscope (Leica, DMIRB) and the level of LC3-II was analyzed by Western blots.

#### Results

The formation of ADSC spheroids was observed on Petri dish, and the LC3-II level of ADSCs on Petri dish was upregulated in 2.5-fold versus TCPS.

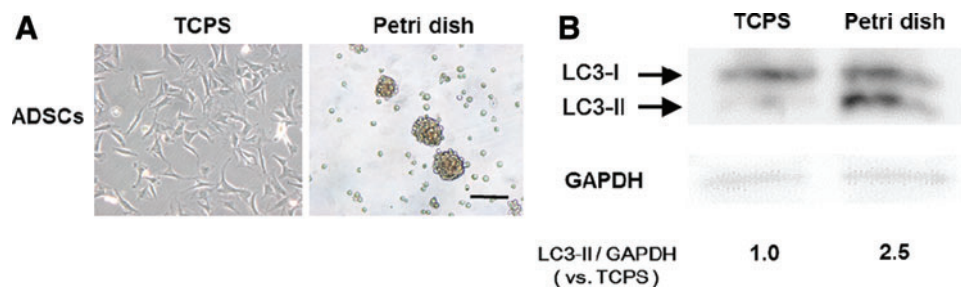

**SUPPLEMENTARY FIG. S1.** (A) ADSCs were seeded on TCPS or Petri dish for 8 h. The morphologies of ADSCs were observed by a microscope. Scale bar = 100  $\mu\text{m}$ . (B) Cell lysates were collected for Western blot analysis with anti-LC3 for LC3-II. GAPDH was used as an internal control. Band intensities were quantified and normalized to GAPDH. ADSCs, adipose-derived stem cells; TCPS, tissue culture polystyrene.

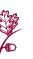

Supplement: Supp_Data.pdf [file Supp_Data.pdf]
